# Supplementary material for: Fungal and Bacterial Loads: Noninvasive Inflammatory Bowel Disease Biomarkers for the Clinical Setting
Source: PubMed Central journal article supplement (PMC8547002; doi:10.1128/msystems.01277-20), 2021-03-23

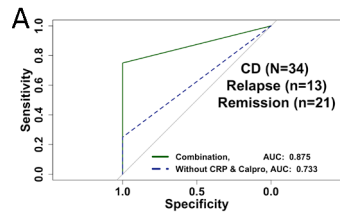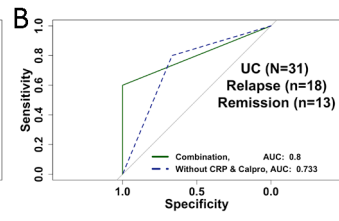

Supplement: msystems.01277-20-sf001.pdf [file msystems.01277-20-sf001.pdf]
